# Supplementary material for: Overexpression of LiDXS and LiDXR From Lily (Lilium ‘Siberia’) Enhances the Terpenoid Content in Tobacco Flowers
Source: PubMed Central journal article supplement (PMC6046550; doi:10.3389/fpls.2018.00909), 2018-07-09
Supplement: Presentation_1.pdf [file Presentation_1.pdf]

## Supplementary Material

### Overexpression of *LiDXS* and *LiDXR* from Lily (*Lilium* ‘Siberia’) Enhances the Terpenoid Content in Tobacco Flowers

Ming Sun\*, Tengxun Zhang, Yanhong Guo, Xuejun Shi, Yongjuan Yang, Juntong Chen, Tangchun Zheng, Yu Han, Sagheer Ahmad

\* Correspondence: Ming Sun: sunmingbjfu@163.com

#### 1 Supplementary Figures and Tables

##### 1.1 Supplementary Figures

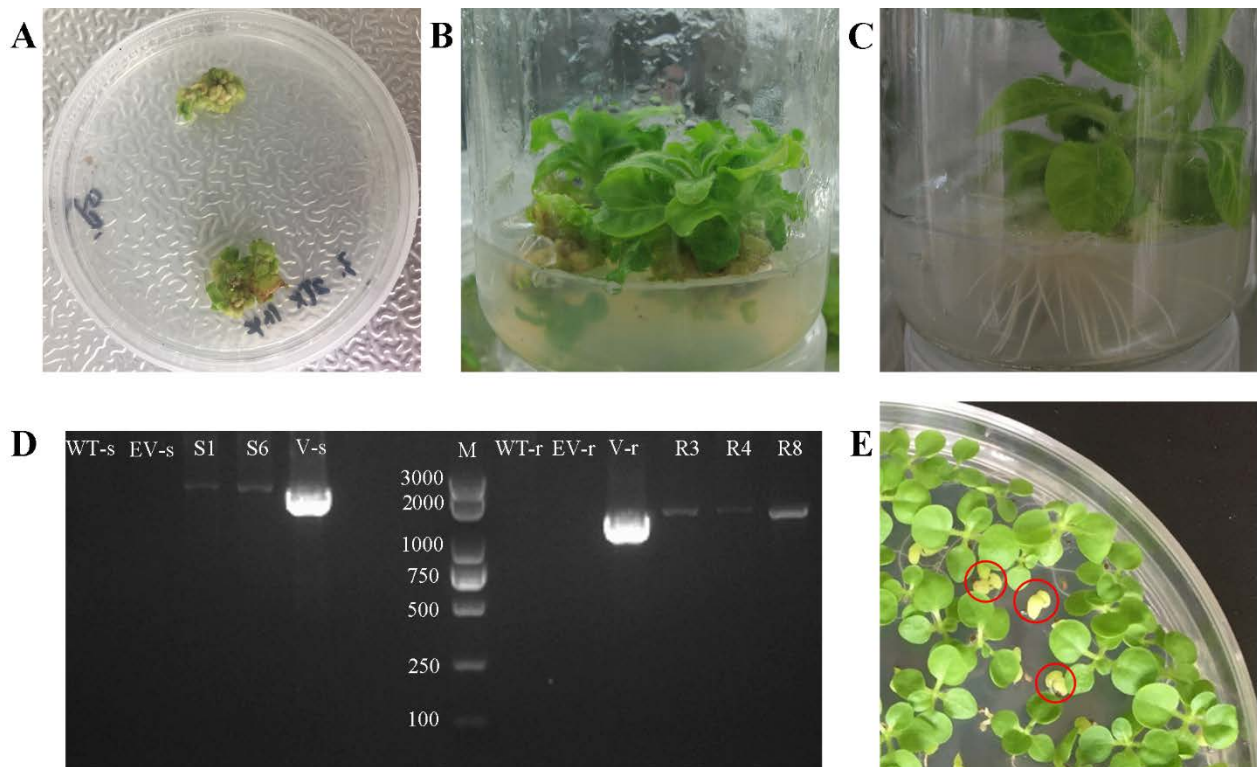

**Supplementary Figure 1.** The process of selection of transgenic plants. (A) Tobacco leaf differentiation. (B) Regeneration from callus. (C) Rooting culture. (D) WT: wild type, EV: transgenic lines with empty vector, M: DL3000 DNA Marker; V: expression vector, *pSuper1300::LiDXS* and *pSuper1300::LiDXR*. (E) Transgenic plants were screened on Murashige and Skoog's medium containing hygromycin. Sensitive plants are displayed in red cycles.

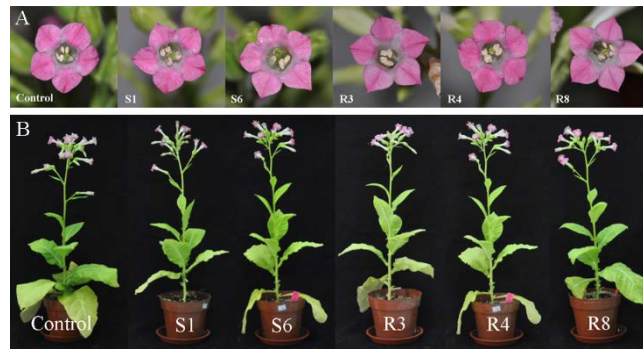

**Supplementary Figure 2.** The phenotypes of overexpressing transgenic plants. (A) The flower feature transgenic plants. (B) The phenotypes of whole plants.

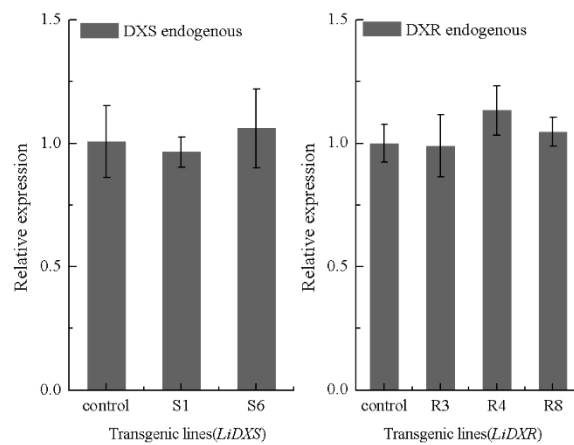

**Supplementary Figure 3.** Transcription profile of endogenous *DXS* and *DXR* genes in the flower of transgenic tobacco lines.

## 1.2 Supplementary Table

**Supplementary Table 1.** Primers sequences used in this study.

| Primers name       | Sequence (5'→3')                                       | Purpose                     |
|--------------------|--------------------------------------------------------|-----------------------------|
| <i>DXS</i> -F1     | TTYGGCACSGGSCACAGYTC                                   | intermediate fragment       |
| <i>DXS</i> -R1     | GGRGCCATKACDAYCATGTT                                   | amplification               |
| 3' GSP             | GCAAGATCAAGGATTTGCCAGCA<br>CCAGG                       | 3' RACE                     |
| 5' GSP             | TCTTGCTGTCGACCTCCGCTTCTT<br>TGA                        | 5' RACE                     |
| <i>DXS</i> -F      | ATGGGGGCCCTTCTCTTTCGTCAA<br>G                          | full-length cDNA            |
| <i>DXS</i> -R      | CTAACTCAAATGCATGGCCTCTTT<br>C                          | amplification               |
| <i>DXR</i> -F      | ATGGCAGCCCTGAAGCTTCCTCTA<br>C                          | full-length cDNA            |
| <i>DXR</i> -R      | TCATACAGGAACTGGACTCAAGC<br>CA                          | amplification               |
| <i>DXS</i> -qF     | AACAATCAGGTGTCTCTCCCGA                                 | Real-time PCR               |
| <i>DXS</i> -qR     | GAACCGCCCTTCTCCTTTCTTATG                               | Real-time PCR               |
| <i>DXR</i> -qF     | ACCCAGATGCTGTCACGGTAGTT<br>A                           | Real-time PCR               |
| <i>DXR</i> -qR     | GTGAGCAAGGGGAAGCACAAAG                                 | Real-time PCR               |
| <i>NtEfa1</i> - qF | ACACCCTGTACTACTCACTGAAC<br>G                           | Transgenic real-time<br>PCR |
| <i>NtEfa1</i> - qR | GCAGTAGTGGTGAACGAGTAGCC                                | Transgenic real-time<br>PCR |
| <i>NtDXS</i> - qF  | CAACACAAACTTACTCAGGTCAA<br>G                           | Transgenic real-time<br>PCR |
| <i>NtDXS</i> - qR  | TGCATAGTATTCTCCTTTTCTGA<br>C                           | Transgenic real-time<br>PCR |
| <i>NtDXR</i> - qF  | AGAACGAGACACACAGTACTTC                                 | Transgenic real-time<br>PCR |
| <i>NtDXR</i> - qR  | AGTCCACAGGAGTAGGGAAA                                   | Transgenic real-time<br>PCR |
| <i>DXS</i> -pF     | <u>CCAAATCGA</u> CTCTAGAATGGGGG<br>CCCTTCTCTTTCGT      | Vector construction         |
| <i>DXS</i> -pR     | <u>TACCGGATCC</u> ACTAGTCACTCAA<br>ATGCATGGCCTCTTTCGGC | Vector construction         |
| <i>DXR</i> -pF     | <u>CCAAATCGA</u> CTCTAGAATGGCAG<br>CCCTGAAGCTT         | Vector construction         |
| <i>DXR</i> -pR     | <u>TACCGGATCC</u> ACTAGTCTACAGG<br>AACTGGACTCAAGCCA    | Vector construction         |
